# Supplementary material
Source: Springer Nature journal article supplement (https://www.springermedizin.de/resource/supplementary/12885_2011_2935_MOESM5_ESM.pdf/9462314)
Supplement: MOESM5 [file 9462314]

Cumulative proportion surviving

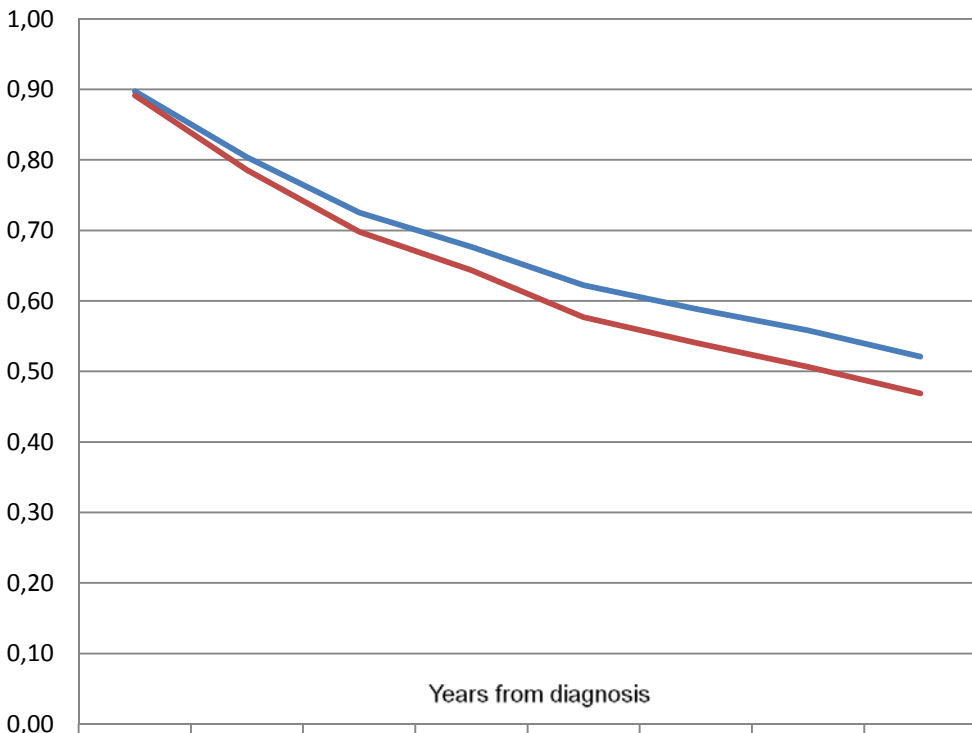

|                  | 1    | 2    | 3    | 4    | 5    | 6    | 7    | 8    |
|------------------|------|------|------|------|------|------|------|------|
| DFSa Stage I-III | 0,90 | 0,80 | 0,73 | 0,68 | 0,62 | 0,59 | 0,56 | 0,52 |
| DFSb Stage I-III | 0,89 | 0,79 | 0,70 | 0,64 | 0,58 | 0,54 | 0,51 | 0,47 |

Cumulative proportion surviving  $\pm$  Standard Error

Years from diagnosis

3

5

7

Stage I-III DFSa

72,5 $\pm$ 2,5

62,2 $\pm$ 2,7

55,8 $\pm$ 2,8

Stage I-III DFSb

69,8 $\pm$ 2,5

57,7 $\pm$ 2,7

50,6 $\pm$ 2,8
